# Supplementary material for: Are vegetation-related roughness changes the cause of the recent decrease in dust emission from the Sahel?
Source: PubMed Central journal article supplement (PMC4373181; doi:10.1002/grl.50273), 2013-05-13
Supplement: grl0040-1868-sd7.pdf [file grl0040-1868-sd7.pdf]

## 1 **Auxiliary Material**

2

### 3 ***Trend Analysis***

4 Auxiliary Figure 1 shows time series and trend lines in analogy to Figure 2 of the main paper,  
5 but for the seven individual stations. This helps to illustrate station-to-station variations in  
6 addition to Table 1 of the main paper. Auxiliary Table 1 adds further detail to Table 1 of the  
7 main paper by providing trends and correlations between wind and dust variables for  
8 individual seasons.

### 9 ***Data Availability***

10 To check that the station trends are not the symptom of biases in data availability we  
11 computed trends at the main SYNOP hours of 0000, 0600, 1200 and 1800 UTC for mean  
12 wind, DUP, and FDE. Aux Figs.. 2a,b and c show consistently negative trends through the  
13 day and night for all parameters. There are no correlations above 0.5 between the wind  
14 parameters and the number of observations. Although the number of available observations at  
15 each station varies from 67582 at Nouakchott to 29777 at Nema (Table 1), there are no  
16 notable seasonal differences in the number of available reports (Fig. 2d), which increases  
17 confidence in the negative seasonal trends we observe (Table 1, rows 5-7). Generally, the  
18 number of reports at the hours 0300, 0900, 1500 and 2100 UTC have increased, but these  
19 make a relatively small contribution to the dataset anyway (Aux Fig 3).

### 20 ***Instrument Issues***

21 As SYNOP observations are reported in knots, we adjust our analysis to compare the number  
22 of reports of 0 kts with reports of 1, 2, and 3 kts. In Auxiliary Fig. 4 we refer to the two  
23 different series as  $0 \text{ ms}^{-1}$  and  $1.5 \text{ ms}^{-1}$ , as 3 kts is equal to  $1.54 \text{ ms}^{-1}$ . We calculate the

24 significance of trends in  $1.5 \text{ ms}^{-1}$  and  $0 \text{ ms}^{-1}$  reports as well as the correlations between mean  
25 wind and  $0 \text{ ms}^{-1}$  reports and  $0 \text{ ms}^{-1}$  and  $1.5 \text{ ms}^{-1}$  (Aux Table 2). Agadez, Nema, Gao, and  
26 Nouakchott do not show any suspicious behavior. A significant negative correlation of -0.4  
27 between  $0 \text{ ms}^{-1}$  and  $1.5 \text{ ms}^{-1}$  is found at Niamey (Aux Fig. 4c, Aux Table 2). This appears to  
28 be mainly due to a period from the mid-1990s to the early 2000s when the number of  $0 \text{ ms}^{-1}$   
29 reports is significantly enhanced (Aux Fig. 4c). The reason for this is not clear, but the good  
30 correspondence between the mean wind V, DUP, and the independently measured FDE  
31 shown in Aux Fig. 1c suggests that there is no significant influence on our analysis. Gouré  
32 has no available wind data in the period 2000 to 2003 (Aux Fig. 4b). The high percentage of  
33  $0 \text{ ms}^{-1}$  reports just before this period signify a problem with the instrument, which might have  
34 been replaced after the gap. The continuation of the trend after the gap, and good  
35 correspondence with the independently measured FDE, support the usefulness of the record  
36 from this station. The steep drop in the percentage of  $0 \text{ ms}^{-1}$  reports from 1985 to 1991 in the  
37 Tombouctou time series (Aux Fig. 4e) is suspicious. However, for 1984–1992 alone, when  $0$   
38  $\text{ms}^{-1}$  reports are high, the correlation with  $1.5 \text{ ms}^{-1}$  is insignificant. The large percentage of  $0$   
39  $\text{ms}^{-1}$  reports at the start of the record is reflected in the mean wind and therefore contributes to  
40 the overall positive mean wind trend, which is opposite of what is observed at the other  
41 stations (Table 1.). For the remaining period (1993–2010) the correlation between  $0 \text{ ms}^{-1}$  and  
42  $1.5 \text{ ms}^{-1}$  is highly significant at -0.64. This would be consistent with instrument degradation,  
43 but the negative trend in the number of  $0 \text{ ms}^{-1}$  reports does not support this (Aux Fig. 4e, Aux  
44 table 2). We chose to include Tombouctou because ultimately, this analysis did not produce  
45 any clear signs of instrument degradation.

46

47 ***ERA-Interim versus station observations***

48 In the main paper, various parameters averaged over the seven Sahelian stations are  
49 compared to ERA-Interim re-analysis averaged over a larger box encompassing these stations  
50 (blue box in Aux. Figure 5). It is interesting and valid to question what extent the stations  
51 can be regarded representative for this larger area. The seasonal cycle of 10-m winds shows  
52 how the Sahel changes from predominantly northeasterly Harmattan winds in DJF and SON  
53 to the southwesterly monsoon winds in JJA (Aux. Fig. 5). In these seasons, the wind field is  
54 quite homogeneous over the entire ERA-Interim box and can therefore be compared to the  
55 station mean. The only critical season is MAM (Aux Fig. 5b) when the region is in transition  
56 from Harmattan to monsoon flow such that the stations might not necessarily fully represent  
57 the regime over the entire box well. In addition, station data will be affected by the local  
58 environment surrounding it in any given season, leading to disagreement with ERA data. This  
59 is particularly pronounced in summer, when deep moist convection creates dramatic changes  
60 in wind on small time and space scales, which are most likely not well represented in ERA in  
61 general, leading to low correlations between stations and ERA on an inter-annual basis (Aux.  
62 Table 3, row 4). Correlations in all other seasons are above 0.5 peaking in DJF with 0.71.  
63 This is also the time when ERA mean winds are correlated highest with ERA DUP (Aux.  
64 Table 3, row 3) and when largest trends in ERA data are observed (Aux. Table 3, rows 1–2).  
65 Not surprisingly, winter is also the season when correlations with the NAO are highest. This  
66 holds for ERA winds and station-observed winds and FDE (Aux. Table 4).

67

### 68 *Changes in roughness versus surface heat exchange*

69 A change in vegetation cover will affect both roughness and the exchange of sensible and  
70 latent heat between the surface and the atmosphere via evapo-transpiration. More latent  
71 heating implies less sensible heating and therefore less turbulence and weaker winds. The

72 latter can be expected to be only significant during the day and during the moist part of the  
 73 year, i.e., JJA and SON. The fact that station-mean trends in wind and DUP are negative day  
 74 and night throughout the year (Aux. Table 5) indicates very strongly that the roughness effect  
 75 dominates. Absolute changes in mean wind and DUP are greater during the day, when mean  
 76 values are larger. Relative changes are slightly greater at night, except for DUP during the  
 77 vegetation maximum in SON (Aux. Table 5, rows 7 and 8). This suggests that the influence  
 78 of latent heating may be a little more pronounced in this season.

79 **Reference**

80 Klink, K. (1999), Trends in mean monthly maximum and minimum surface wind-speeds in  
 81 the conterminous United States, 1961 to 1990. *Clim. Res.*, 13, 193–205,  
 82 doi:10.3354/cr013193.

83

84 **Auxiliary Figures & Tables**

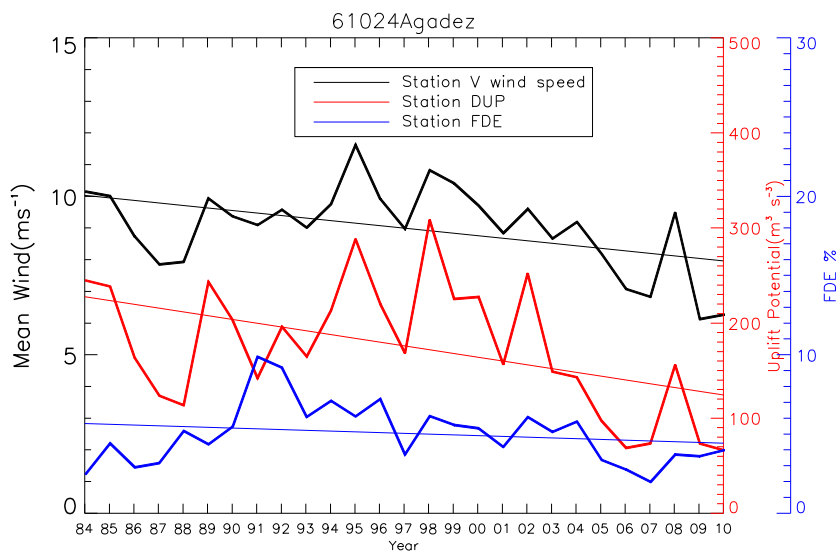

85 a)

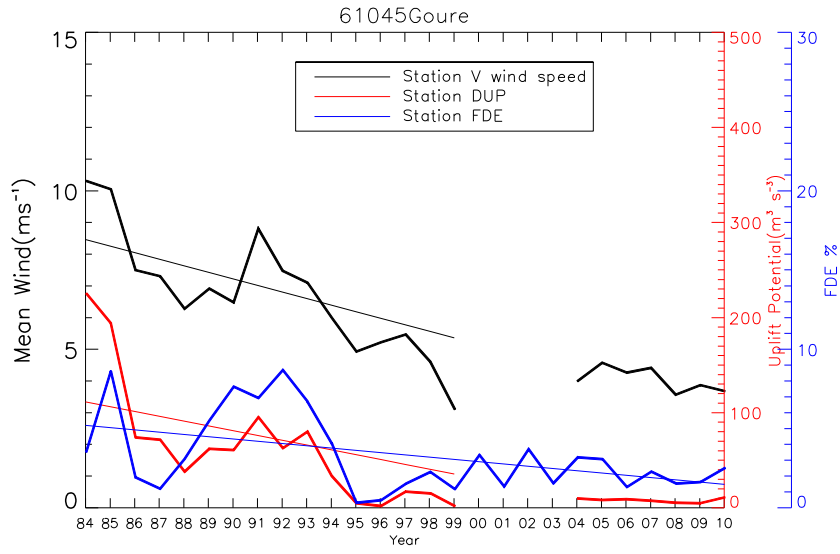

86 b)

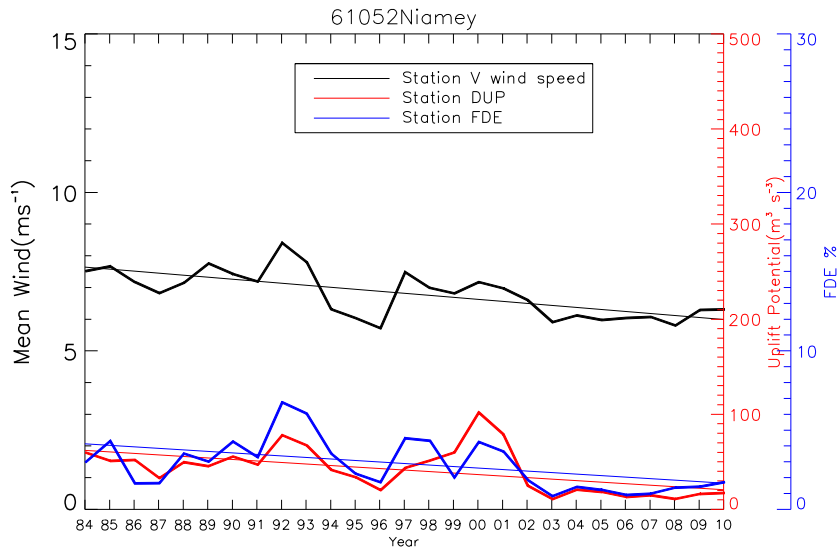

87 c)

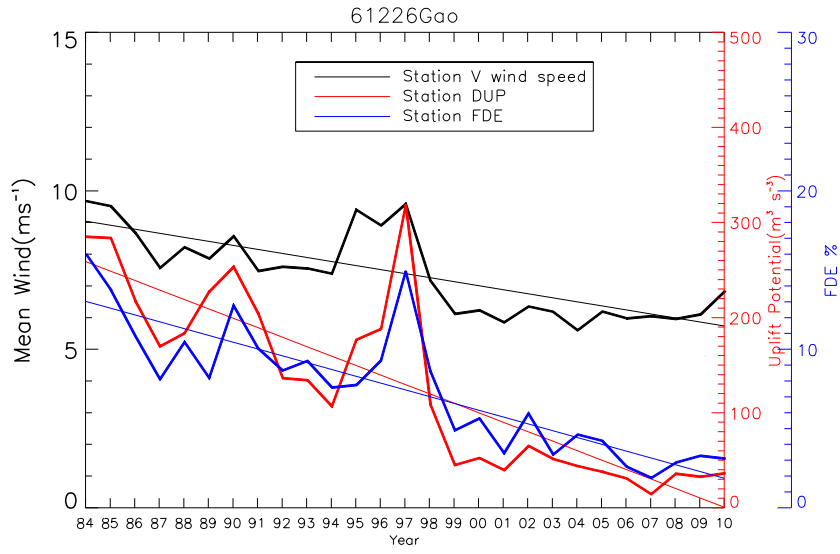

88 d)

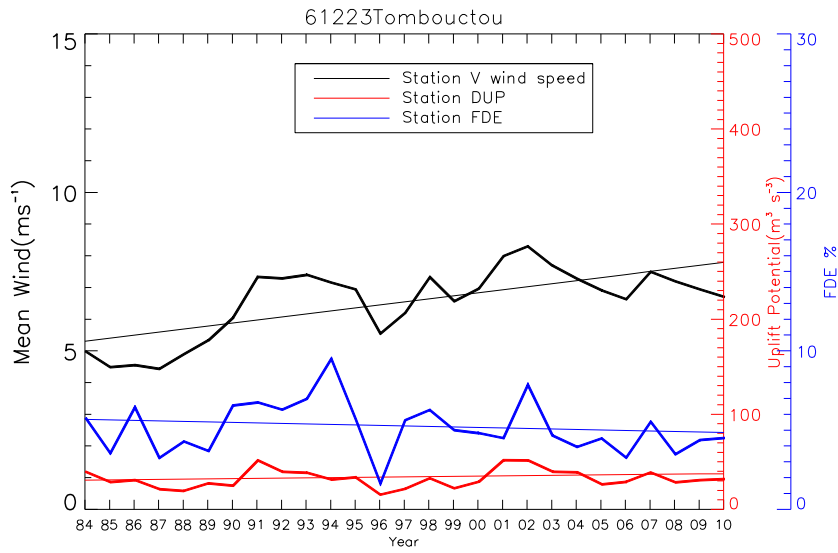

89 e)

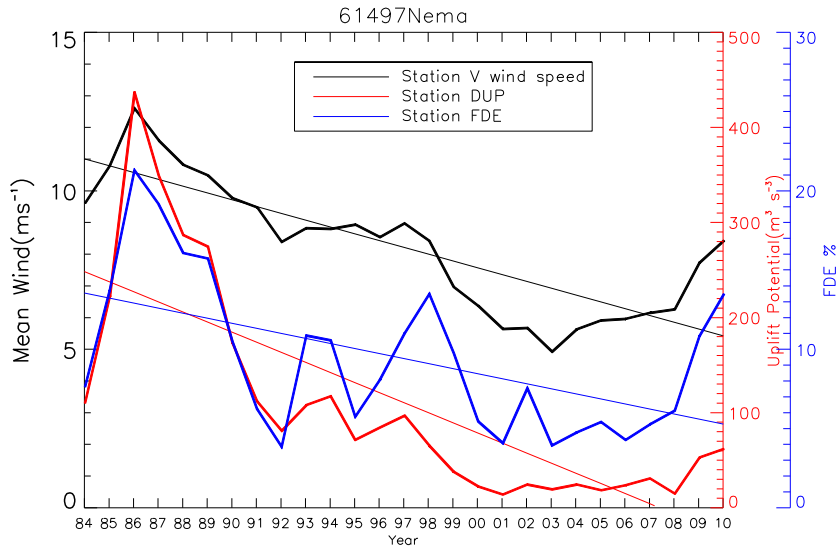

90 f)

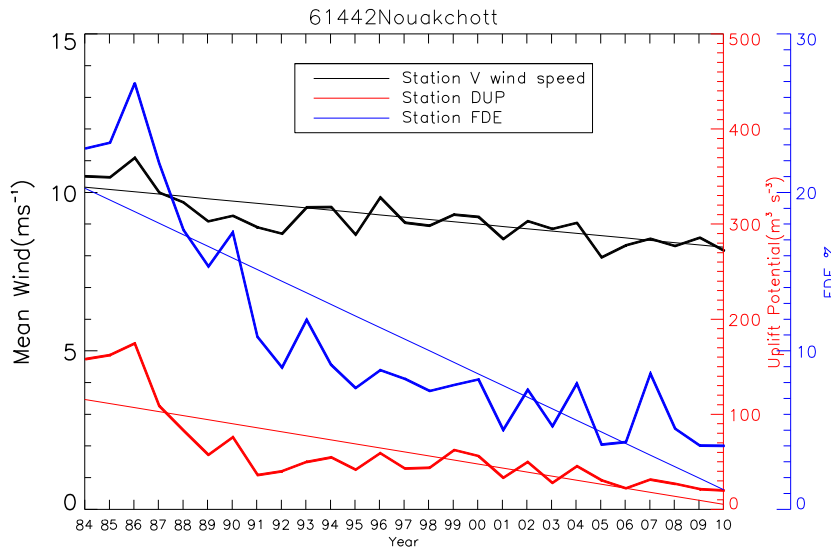

91 g)

92 **Auxiliary Figure 1:** Time series and trends separated by station. Same as Figure 2 in the  
 93 main paper, with trends in mean wind V, DUP, and FDE given in black, red, and blue but for  
 94 the individual stations of a) Agadez, b) Gouré, c) Niamey, d) Gao, e) Tombouctou, f) Nema,  
 95 and g) Nouakchott. Trend values for each station are given in Table 1.

96

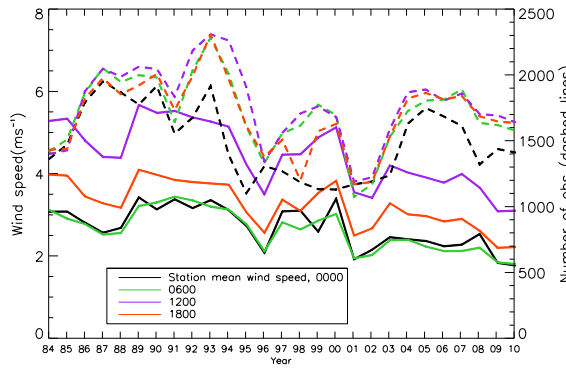

97 a

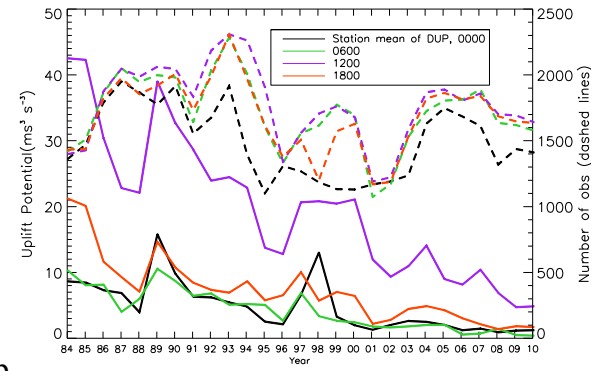

b

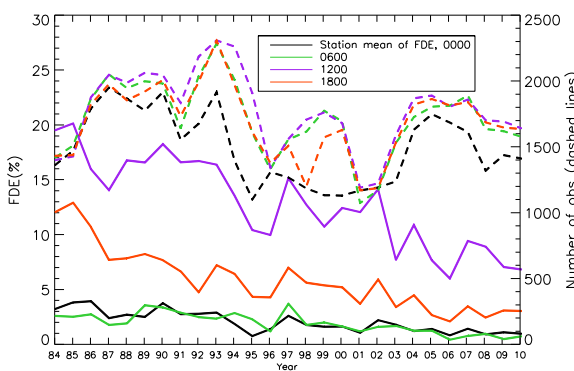

98 c

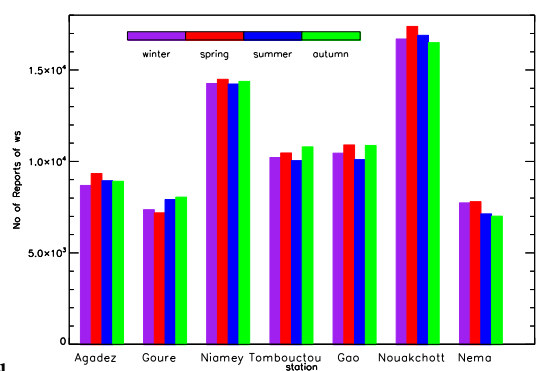

d

99 **Auxiliary Figure 2.** a) Trends in mean wind, averaged over the seven stations for the main  
 100 SYNOP hours 0000 (black), 0600 (green), 1200 (purple) and 1800 UTC (orange). Number of  
 101 wind speed observations are given by the same colors for the same hours with the dashed  
 102 lines. b) same as a) but for DUP. c) same as a) but for FDE. d) Number of wind speed  
 103 observations reported each season for each of the seven stations.

104

105

106



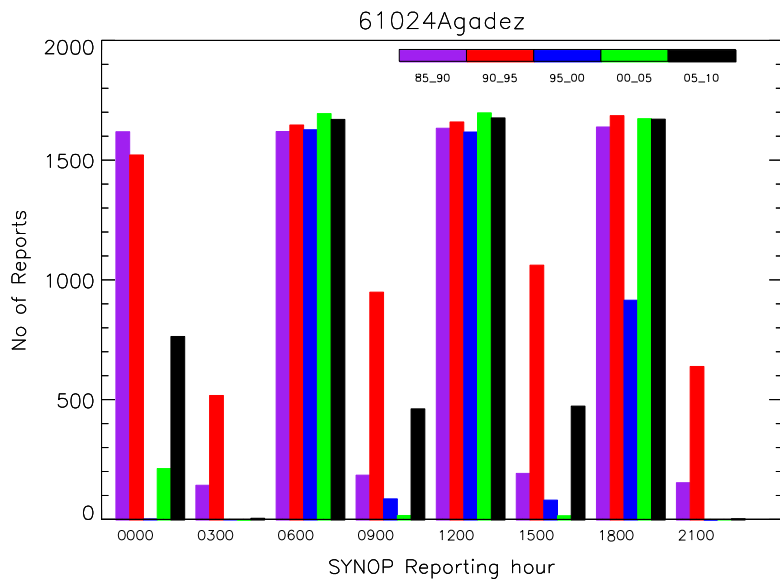

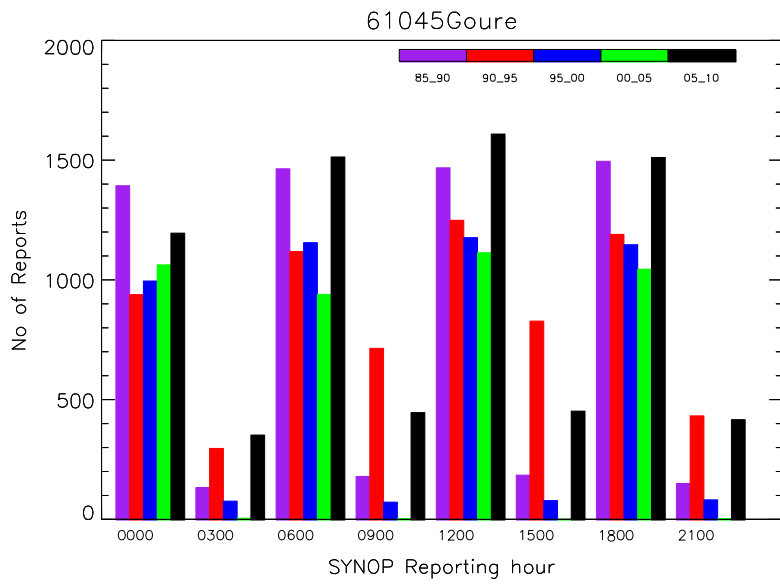

108

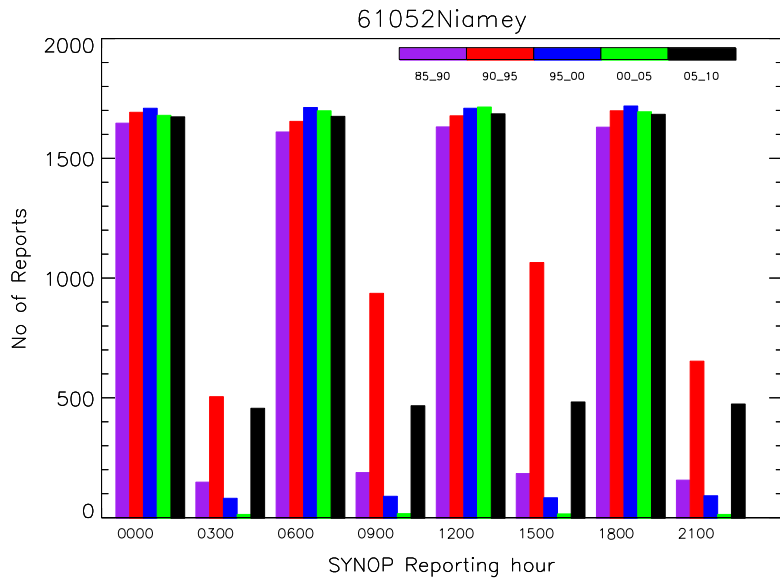

109

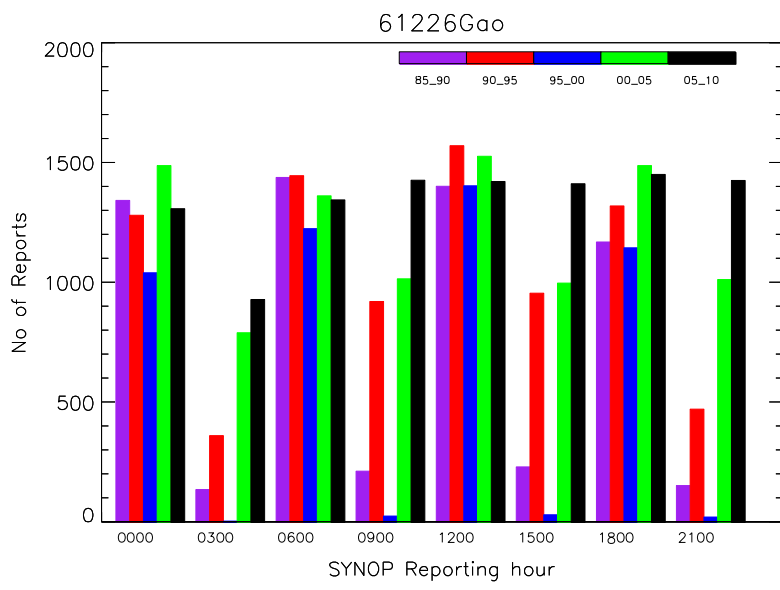

110

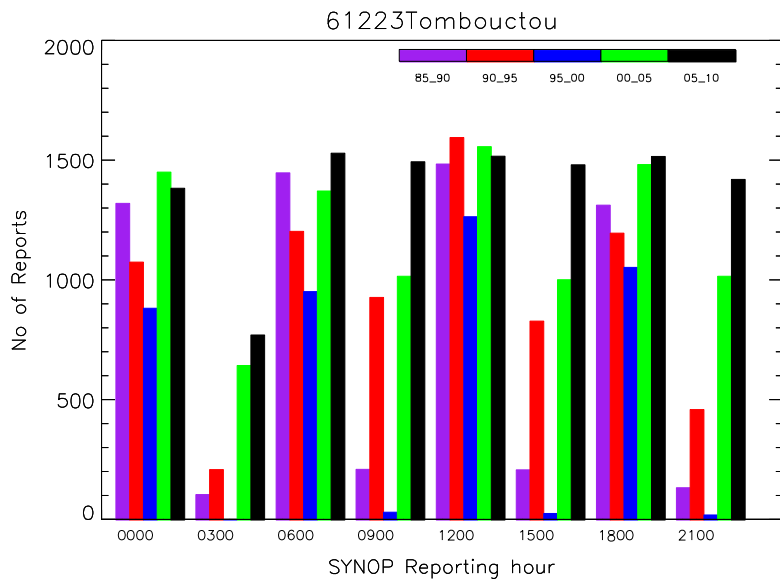

111

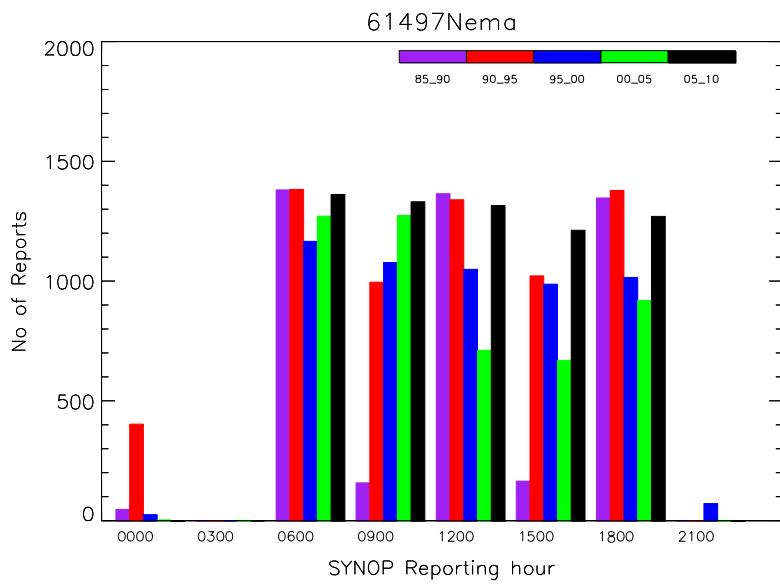

112

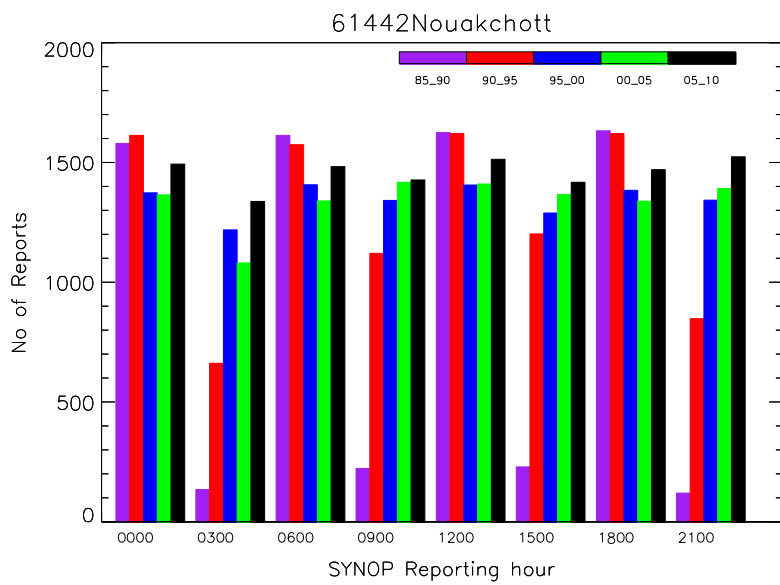

113

114 **Auxiliary Figure 3:** Bar plots of the number of observations at each SYNOP hour, for each  
 115 5-year period between 1985 and 2010 at: a) Agadez, b) Gouré, c) Niamey, d) Gao, e)  
 116 Tombouctou, f) Nema, and g) Nouakchott.

117

118 **Auxiliary Table 1: Seasonality of wind speed and dust trends.**

|          |                                                           | <b>DJF</b>  | <b>MAM</b>  | <b>JJA</b>  | <b>SON</b>  | <b>Year</b> |
|----------|-----------------------------------------------------------|-------------|-------------|-------------|-------------|-------------|
| <b>1</b> | <b>% change in V</b>                                      | <i>-31</i>  | <i>-23</i>  | <i>-26</i>  | <i>-30</i>  | <i>-27</i>  |
| <b>2</b> | <b>% change in FDE</b>                                    | <i>-49</i>  | <i>-34</i>  | <i>-47</i>  | <i>-72</i>  | <i>-68</i>  |
| <b>3</b> | <b>% change in DUP</b>                                    | <i>-84</i>  | <i>-83</i>  | <i>-90</i>  | <i>-91</i>  | <i>-86</i>  |
| <b>4</b> | <b>% change in <math>V &gt; 5 \text{ m s}^{-1}</math></b> | <i>-16</i>  | <i>-14</i>  | <i>-21</i>  | <i>-30</i>  | <i>-20</i>  |
| <b>5</b> | <b>% change in <math>V &lt; 5 \text{ m s}^{-1}</math></b> | <i>-4</i>   | <i>6</i>    | <i>4</i>    | <i>-2</i>   | <i>1</i>    |
| <b>6</b> | <b>V / FDE corr</b>                                       | <i>0.74</i> | <i>0.55</i> | <i>0.41</i> | <i>0.83</i> | <i>0.92</i> |
| <b>7</b> | <b>V / DUP corr</b>                                       | <i>0.92</i> | <i>0.93</i> | <i>0.88</i> | <i>0.76</i> | <i>0.95</i> |
| <b>8</b> | <b>FDE / DUP corr</b>                                     | <i>0.61</i> | <i>0.53</i> | <i>0.46</i> | <i>0.72</i> | <i>0.93</i> |

119

120 **Auxiliary Table 1:** Relative changes (in %) for rows 1–5 are computed in the same way as  
 121 rows 1–3 in Table 1 in the main text. Rows 6–8 give linear correlation coefficients for seven-  
 122 station means of V, FDE, and DUP. Statistical significance of trends and correlations at the  
 123 95% and 99% levels are denoted in bold and in bold italics, respectively.

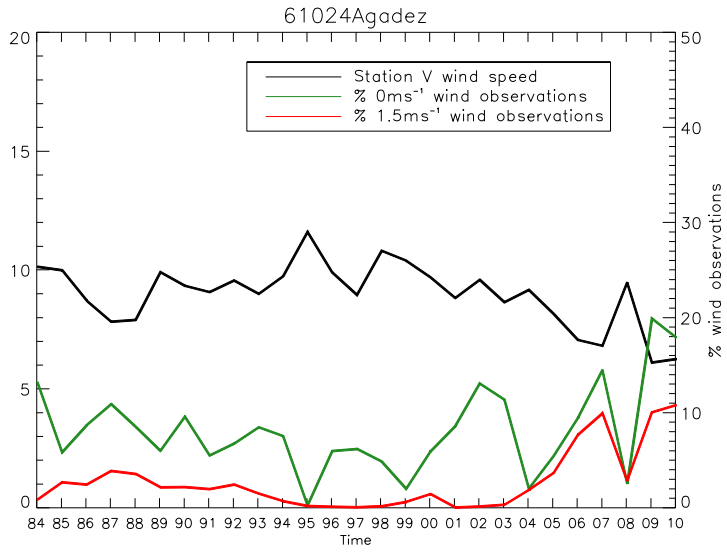

124 a)

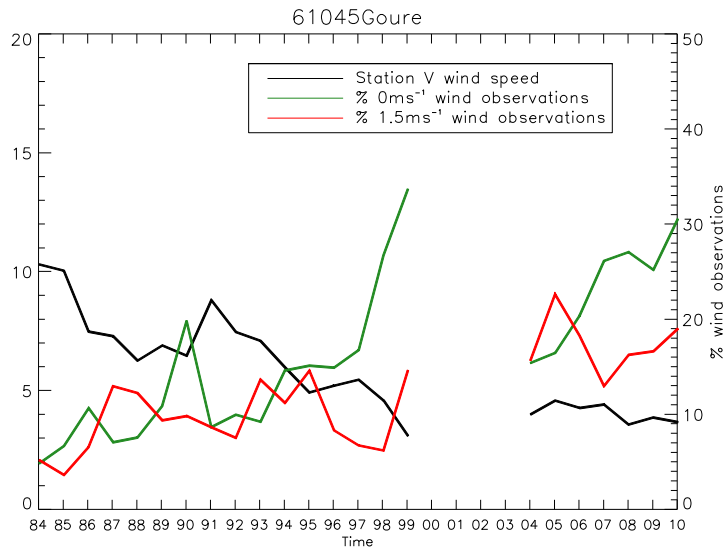

125 b)

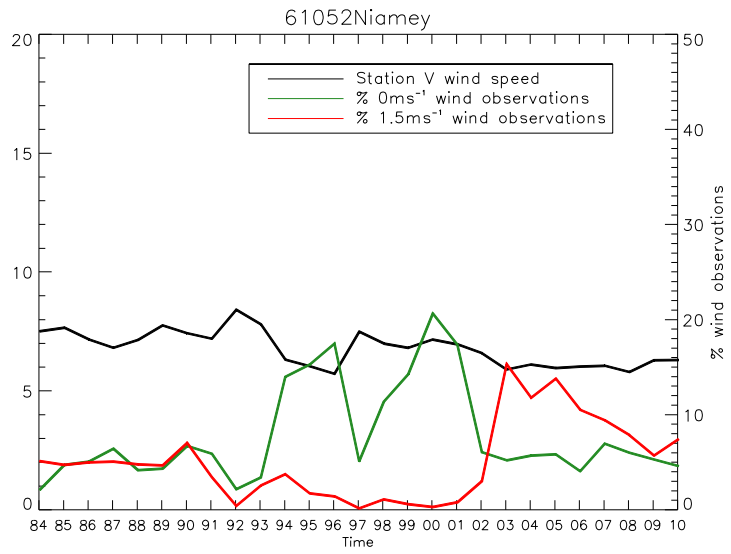

126 c)

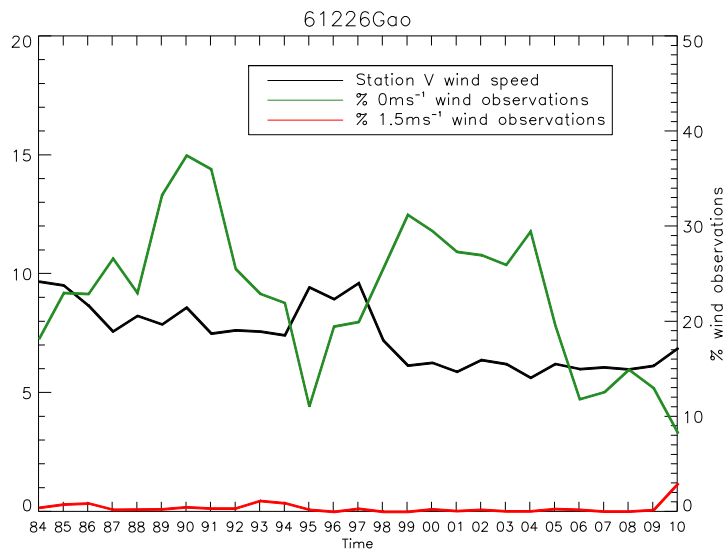

127 d)

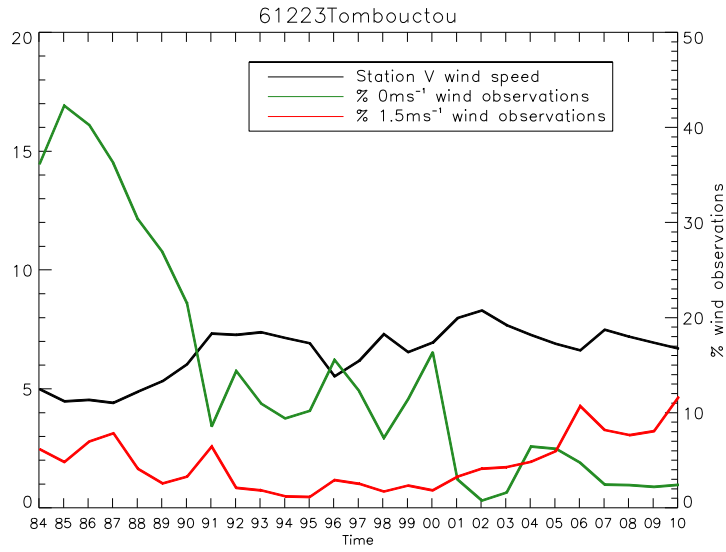

128 e)

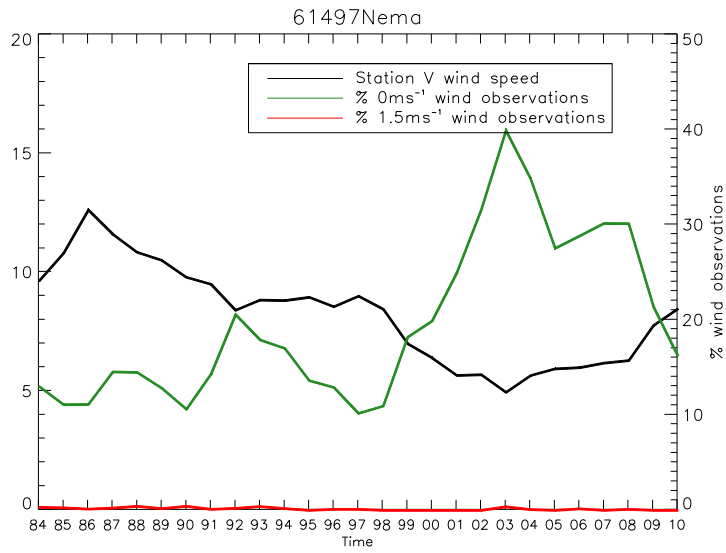

129 f)

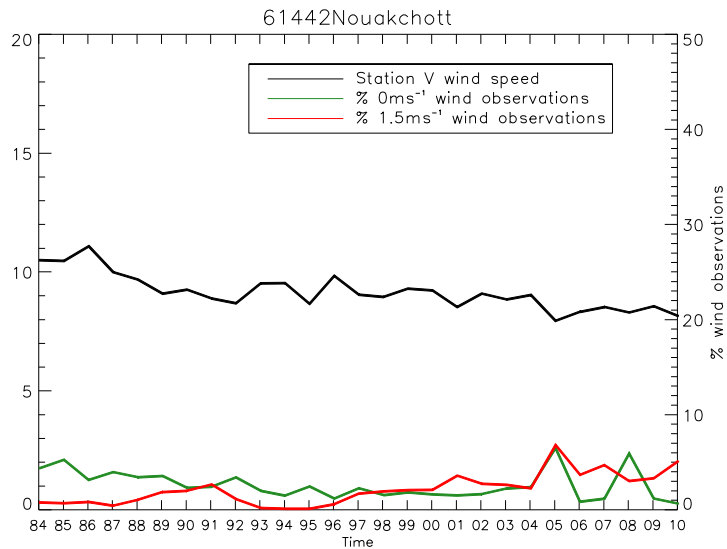

130 g)

131

132 **Auxiliary Figure 4:** Instrument degradation analysis. Time series of mean wind V (black),

133 % of 0 ms<sup>-1</sup> reports (green) and % of 1.5 ms<sup>-1</sup> reports (red) for the individual stations a)

134 Agadez, b) Gouré, c) Niamey, d) Gao, e) Tombouctou, f) Nema, and g) Nouakchott.

135 Percentage lines are calculated relative to all observations available for a given year. Trend

136 line values for the green and red lines can be found in Aux. Table 2 and for the black line in

137 Table 1 of the main paper.

138

139

140

141

142

143



144 **Auxiliary Table 2: Instrument degradation trends and correlations**

|   |                                                                         | Agadez       | Gouré       | Niamey      | Gao          | Tomb.        | Nema         | Nouakchott   |
|---|-------------------------------------------------------------------------|--------------|-------------|-------------|--------------|--------------|--------------|--------------|
| 1 | <b>0 ms<sup>-1</sup> trend</b>                                          | <b>-52</b>   | <b>-186</b> | <b>-33</b>  | <b>39</b>    | <b>112</b>   | <b>-190</b>  | <b>49</b>    |
| 2 | <b>&lt;1.5 ms<sup>-1</sup> trend</b>                                    | <b>-1228</b> | <b>-176</b> | <b>-220</b> | <b>-2</b>    | <b>-119</b>  | <b>99</b>    | <b>-1909</b> |
| 3 | <b>Correlation:</b><br><b>&lt;1.5 ms<sup>-1</sup>/0 ms<sup>-1</sup></b> | <b>0.65</b>  | <b>0.52</b> | <b>-0.4</b> | <b>-0.29</b> | <b>-0.07</b> | <b>-0.16</b> | <b>-0.02</b> |

145

146 **Auxiliary Table 2.** Rows 1 and 2 contain the 0 ms<sup>-1</sup> trend (green lines) and <1.5 ms<sup>-1</sup> trend  
 147 (red lines) values as plotted in Aux. Figure 3. Row 3 gives the corresponding linear  
 148 correlation. Statistical significance of trends and correlations at the 95% and 99% levels are  
 149 denoted in bold and in bold italics, respectively.

150

151

152

153

154

155

Sahel Observation stations, DJF Vectors

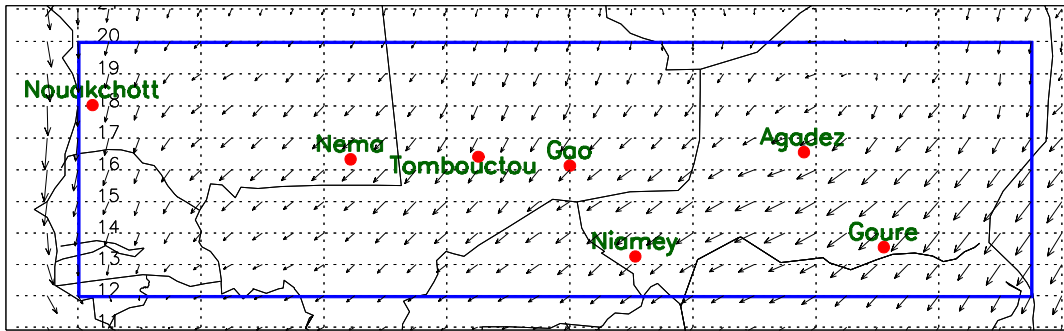

156 a)

Sahel Observation stations, MAM Vectors

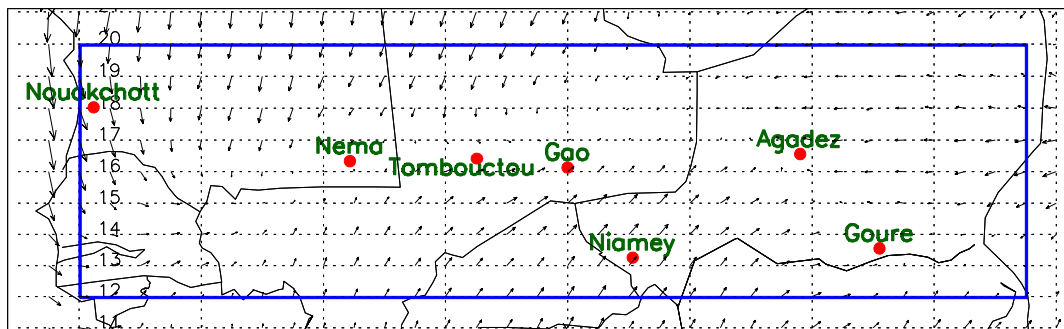

157 b)

Sahel Observation stations, JJA Vectors

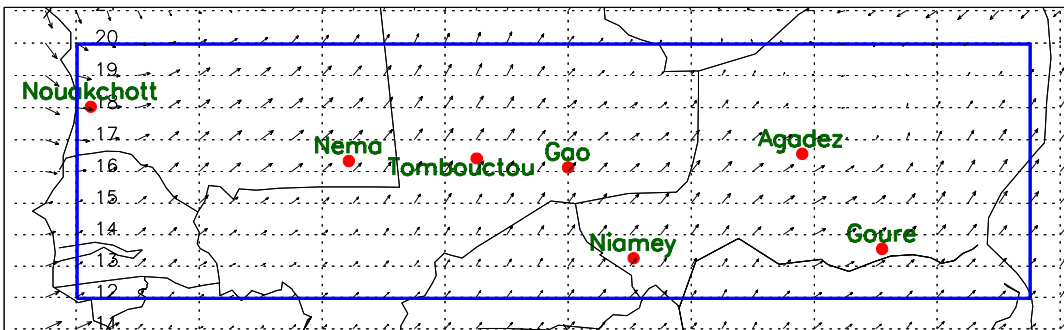

158 c)

Sahel Observation stations, SON Vectors

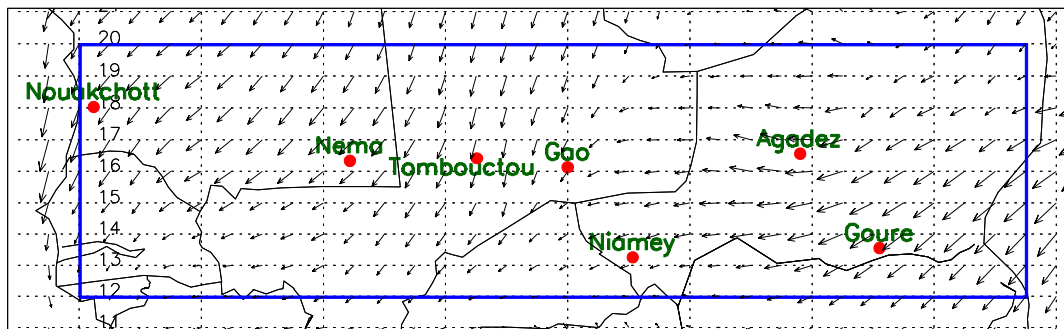

159 d)

160

161 **Auxiliary Figure 5:** Seasonality of ERA mean wind vectors. Map of the Sahel with station  
 162 locations and the ERA-Interim 10 m mean wind vectors for a) DJF, b) MAM, c) JJA, and d)  
 163 SON similar to Fig. 1 of the main paper. The blue box is the area domain used for averaging  
 164 ERA 10-m winds in the trend and correlation analysis.

165

166

167 **Auxiliary Table 3: Seasonality of ERA mean wind and DUP**

|          |                                    | <b>DJF</b>         | <b>MAM</b>         | <b>JJA</b>          | <b>SON</b>         | <b>Year</b>        |
|----------|------------------------------------|--------------------|--------------------|---------------------|--------------------|--------------------|
| <b>1</b> | <b>% change in ERA V</b>           | <b>-7</b>          | <b>-4</b>          | <b>2</b>            | <b>-5</b>          | <b>-3</b>          |
| <b>2</b> | <b>% change in ERA DUP</b>         | <b>-31</b>         | <b>-5</b>          | <b>2</b>            | <b>-27</b>         | <b>14</b>          |
| <b>3</b> | <b>ERA V / ERA DUP correlation</b> | <b><i>0.85</i></b> | <b><i>0.83</i></b> | <b><i>0.50</i></b>  | <b><i>0.80</i></b> | <b><i>0.60</i></b> |
| <b>4</b> | <b>ERA V / Obs V correlations</b>  | <b><i>0.71</i></b> | <b><i>0.56</i></b> | <b><i>-0.07</i></b> | <b><i>0.53</i></b> | <b><i>0.56</i></b> |

168

169 **Auxiliary Table 3:** Seasonality of ERA mean wind and DUP. Relative changes (in %) of  
 170 ERA-Interim mean wind V and DUP. Rows 1 and 2 are computed in the same way as rows  
 171 1–3 in Table 1 in the main text. Statistical significance of trends and correlations at the 95%  
 172 and 99% levels are denoted in bold and in bold italics, respectively.

173

174

175

176

177

178 **Auxiliary Table 4: Correlations of mean wind and observed dust with the NAO index.**

|          |              | <b>DJF</b>         | <b>MAM</b>  | <b>JJA</b>   | <b>SON</b>  | <b>Year</b> |
|----------|--------------|--------------------|-------------|--------------|-------------|-------------|
| <b>1</b> | <b>V ERA</b> | <i><b>0.77</b></i> | <b>0.31</b> | <b>-0.21</b> | <b>0.43</b> | <b>0.58</b> |
| <b>2</b> | <b>V OBS</b> | <b>0.5</b>         | <b>0.14</b> | <b>0.43</b>  | <b>0.28</b> | <b>0.46</b> |
| <b>3</b> | <b>FDE</b>   | <b>0.58</b>        | <b>0.36</b> | <b>0.26</b>  | <b>0.3</b>  | <b>0.52</b> |

179

180 **Auxiliary Table 4:** Correlations of mean wind and observed dust with the NAO index.

181 Seasonal correlations of ERA-Interim mean wind V (row 1), observation mean wind V (row  
182 2), and observed FDE (row 3) with the seasonal Jones NAO Index (as described in Section  
183 2). Significance of trends and correlations at the 95% and 99% levels are denoted in bold and  
184 in bold italics, respectively.

185

186

187

188

189

190

191

192 **Auxiliary Table 5: Day/night station trends comparison**

|                                                               |          |                  | DJF          | MAM          | JJA          | SON          | Year         |
|---------------------------------------------------------------|----------|------------------|--------------|--------------|--------------|--------------|--------------|
| <b>Absolute trends</b><br>(ms <sup>-1</sup> a <sup>-1</sup> ) | <b>1</b> | <b>Day V</b>     | <i>-0.07</i> | <i>-0.05</i> | <i>-0.05</i> | <i>-0.06</i> | <i>-0.06</i> |
|                                                               | <b>2</b> | <b>Night V</b>   | <i>-0.09</i> | <i>-0.05</i> | <i>-0.05</i> | <i>-0.04</i> | <i>-0.04</i> |
|                                                               | <b>3</b> | <b>Day DUP</b>   | <i>-9.5</i>  | <i>-8.1</i>  | <i>-5.5</i>  | <i>-4.9</i>  | <i>-7</i>    |
|                                                               | <b>4</b> | <b>Night DUP</b> | <i>-3.8</i>  | <i>-2.6</i>  | <i>-3.8</i>  | <i>-1.7</i>  | <i>-3</i>    |
| <b>relative change</b><br>(%)                                 | <b>5</b> | <b>Day V</b>     | <i>-30</i>   | <i>-25</i>   | <i>-27</i>   | <i>-36</i>   | <i>-28</i>   |
|                                                               | <b>6</b> | <b>Night V</b>   | <i>-59</i>   | <i>-35</i>   | <i>-39</i>   | <i>-53</i>   | <i>-31</i>   |
|                                                               | <b>7</b> | <b>Day DUP</b>   | <i>-83</i>   | <i>-86</i>   | <i>-87</i>   | <i>-92</i>   | <i>-86</i>   |
|                                                               | <b>8</b> | <b>Night DUP</b> | <i>-105</i>  | <i>-91</i>   | <i>-98</i>   | <i>-79</i>   | <i>-97</i>   |

193

194 **Auxiliary Table 5:** Day/night station trends comparison. Seasonal absolute and relative  
 195 trends of day and night data from station averaged observations. Absolute trends in rows 1–4  
 196 are calculated as the average change in wind speed per year, while rows 5–8 represent the  
 197 total change in wind speed during the study period 1984–2010 as a % of the initial value.  
 198 Significance of trends at the 95% and 99% levels are denoted in bold and in bold italics,  
 199 respectively.

200
