# Supplementary material for: Are vegetation-related roughness changes the cause of the recent decrease in dust emission from the Sahel?
Source: PubMed Central journal article supplement (PMC4373181; doi:10.1002/grl.50273), 2013-05-13
Supplement: grl0040-1868-sd8.pdf [file grl0040-1868-sd8.pdf]

1 **Auxiliary Material**

2

3 ***Trend Analysis***

4 Auxiliary Figure 1 shows time series and trend lines in analogy to Figure 2 of the main paper,  
5 but for the seven individual stations. This helps to illustrate station-to-station variations in  
6 addition to Table 1 of the main paper. Auxiliary Table 1 adds further detail to Table 1 of the  
7 main paper by providing trends and correlations between wind and dust variables for  
8 individual seasons.

9 **Data Availability**

10 To check that the station trends are not the symptom of biases in data availability we  
11 computed trends at the main SYNOP hours of 0000, 0600, 1200 and 1800 UTC for mean  
12 wind, DUP, and FDE. Aux Figs.. 2a,b and c show consistently negative trends through the  
13 day and night for all parameters. There are no correlations above 0.5 between the wind  
14 parameters and the number of observations. Although the number of available observations at  
15 each station varies from 67582 at Nouakchott to 29777 at Nema (Table 1), there are no  
16 notable seasonal differences in the number of available reports (Fig. 2d), which increases  
17 confidence in the negative seasonal trends we observe (Table 1, rows 5-7). Generally, the  
18 number of reports at the hours 0300, 0900, 1500 and 2100 UTC have increased, but these  
19 make a relatively small contribution to the dataset anyway (Aux Fig 3).

20 ***Instrument Issues***

21 As SYNOP observations are reported in knots, we adjust our analysis to compare the number  
22 of reports of 0 kts with reports of 1, 2, and 3 kts. In Auxiliary Fig. 24 we refer to the two  
23 different series as  $0 \text{ ms}^{-1}$  and  $1.5 \text{ ms}^{-1}$ , as 3 kts is equal to  $1.54 \text{ ms}^{-1}$ . We calculate the

24 significance of trends in  $1.5 \text{ ms}^{-1}$  and  $0 \text{ ms}^{-1}$  reports as well as the correlations between mean  
25 wind and  $0 \text{ ms}^{-1}$  reports and  $0 \text{ ms}^{-1}$  and  $1.5 \text{ ms}^{-1}$  (Aux Table 2). Agadez, Nema, Gao, and  
26 Nouakchott do not show any suspicious behavior. A significant negative correlation of -0.4  
27 between  $0 \text{ ms}^{-1}$  and  $1.5 \text{ ms}^{-1}$  is found at Niamey (Aux Fig. [2e4c](#), Aux Table 2). This appears  
28 to be mainly due to a period from the mid-1990s to the early 2000s when the number of  $0 \text{ ms}^{-1}$   
29 reports is significantly enhanced (Aux Fig. [2e4c](#)). The reason for this is not clear, but the  
30 good correspondence between the mean wind V, DUP, and the independently measured FDE  
31 shown in Aux Fig. 1c suggests that there is no significant influence on our analysis. Gouré  
32 has no available wind data in the period 2000 to 2003 (Aux Fig. [2b4b](#)). The high percentage  
33 of  $0 \text{ ms}^{-1}$  reports just before this period signify a problem with the instrument, which might  
34 have been replaced after the gap. The continuation of the trend after the gap, and good  
35 correspondence with the independently measured FDE, support the usefulness of the record  
36 from this station. The steep drop in the percentage of  $0 \text{ ms}^{-1}$  reports from 1985 to 1991 in the  
37 Tombouctou time series (Aux Fig. [2e4e](#)) is suspicious. However, for 1984–1992 alone, when  
38  $0 \text{ ms}^{-1}$  reports are high, the correlation with  $1.5 \text{ ms}^{-1}$  is insignificant. The large percentage of  $0$   
39  $\text{ms}^{-1}$  reports at the start of the record is reflected in the mean wind and therefore contributes to  
40 the overall positive mean wind trend, which is opposite of what is observed at the other  
41 stations (Table 1.). For the remaining period (1993–2010) the correlation between  $0 \text{ ms}^{-1}$  and  
42  $1.5 \text{ ms}^{-1}$  is highly significant at -0.64. This would be consistent with instrument degradation,  
43 but the negative trend in the number of  $0 \text{ ms}^{-1}$  reports does not support this (Aux Fig. [2e4e](#),  
44 Aux table 2). We chose to include Tombouctou because ultimately, this analysis did not  
45 produce any clear signs of instrument degradation.

46

47 ***ERA-Interim versus station observations***

48 In the main paper, various parameters averaged over the seven Sahelian stations are  
49 compared to ERA-Interim re-analysis averaged over a larger box encompassing these stations  
50 (blue box in Aux. Figure 45). It is ~~an~~ interesting and valid ~~to question~~ to what extent the  
51 stations can be regarded representative for this larger area. The seasonal cycle of 10-m winds  
52 shows how the Sahel changes from predominantly northeasterly Harmattan winds in DJF and  
53 SON to the southwesterly monsoon winds in JJA (Aux. Fig. 35). In these seasons, the wind  
54 field is quite homogeneous over the entire ERA-Interim box and can therefore be compared  
55 to the station mean. The only critical season is MAM (Aux. Fig. 3b5b) when the region is in  
56 transition from Harmattan to monsoon flow such that the stations might not necessarily fully  
57 represent the regime over the entire box well. In addition, station data will be affected by the  
58 local environment surrounding it in any given season, leading to disagreement with ERA  
59 data. This is particularly pronounced in summer, when deep moist convection creates  
60 dramatic changes in wind on small time and space scales, which are most likely not well  
61 represented in ERA in general, leading to low correlations between stations and ERA on an  
62 ~~interannual~~inter-annual basis (Aux. Table 3, row 4). Correlations in all other seasons are  
63 above 0.5 peaking in DJF with 0.71. This is also the time when ERA mean winds are  
64 correlated highest with ERA DUP (Aux. Table 3, row 3) and when largest trends in ERA  
65 data are observed (Aux. Table 3, rows 1–2). Not surprisingly, winter is also the season when  
66 correlations with the NAO are highest. This holds for ERA winds and station-observed winds  
67 and FDE (Aux. Table 4).

68

### 69 *Changes in roughness versus surface heat exchange*

70 A change in vegetation cover will affect both roughness and the exchange of sensible and  
71 latent heat between the surface and the atmosphere via evapo-transpiration. More latent

72 heating implies less sensible heating and therefore less turbulence and weaker winds. The  
 73 latter can be expected to be only significant during the day and during the moist part of the  
 74 year, i.e., JJA and SON. The fact that station-mean trends in wind and DUP are negative day  
 75 and night throughout the year (Aux. Table 5) indicates very strongly that the roughness effect  
 76 dominates. Absolute changes in mean wind and DUP are greater during the day, when mean  
 77 values are larger. Relative changes are slightly greater at night, except for DUP during the  
 78 vegetation maximum in SON (Aux. Table 5, rows 7 and 8). This suggests that the influence  
 79 of latent heating may be a little more pronounced in this season.

80 **Reference**

81 Klink, K. (1999), Trends in mean monthly maximum and minimum surface wind-speeds in  
 82 the conterminous United States, 1961 to 1990. *Clim. Res.*, 13, 193–205,  
 83 doi:10.3354/cr013193.

84

85 **Auxiliary Figures & Tables**

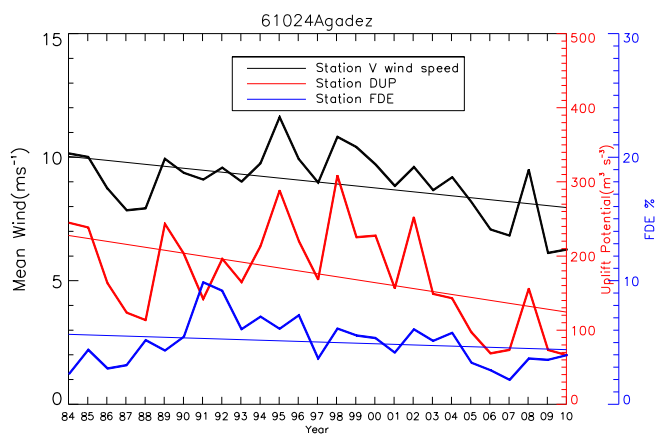

86 a)

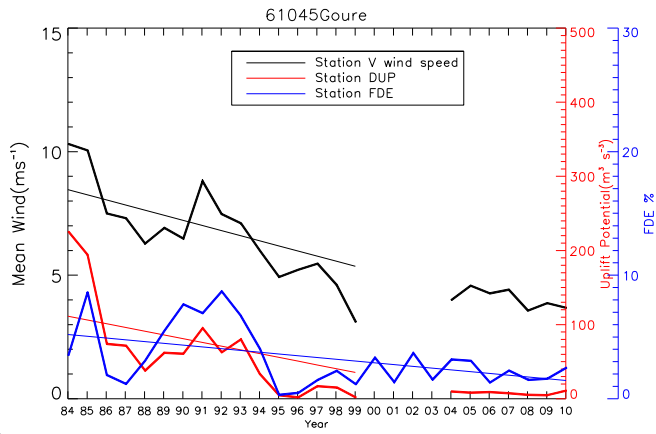

87 b)

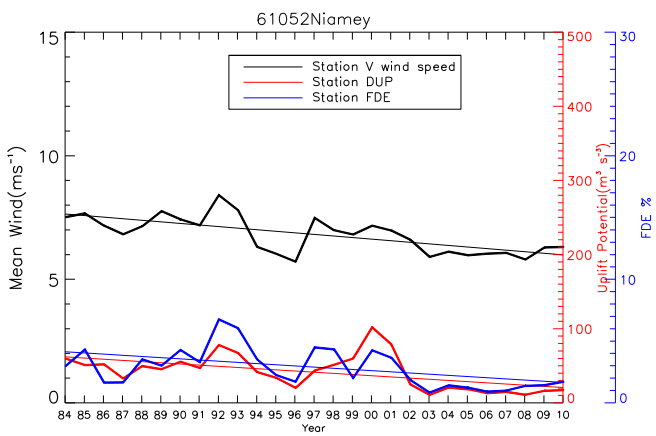

88 c)

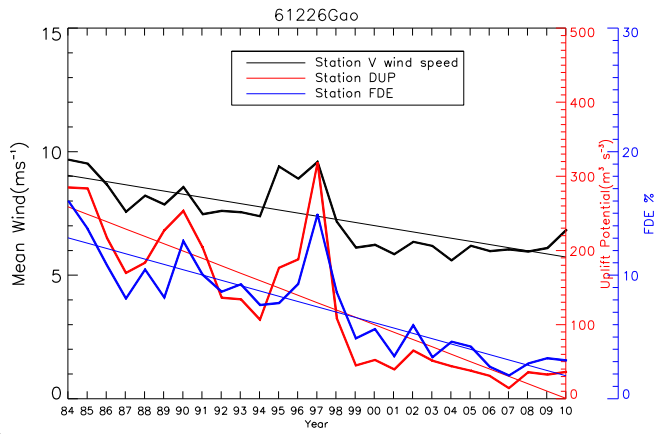

89 d)

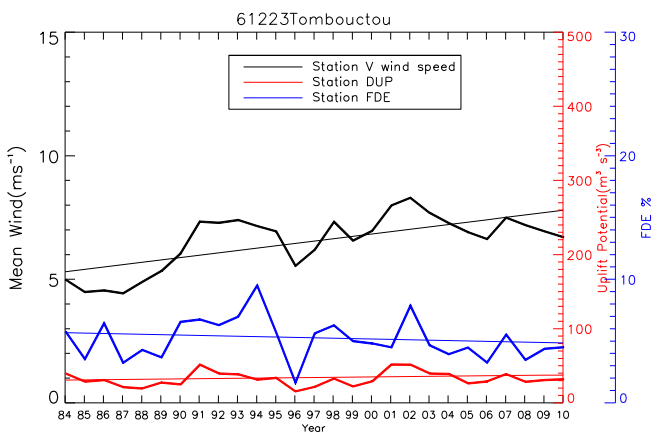

90 e)

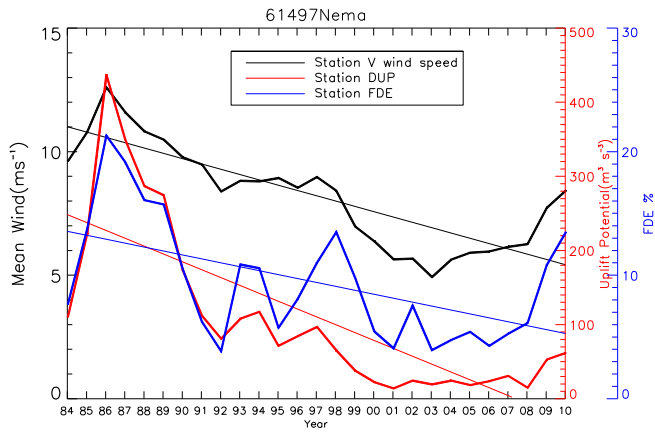

91 f)

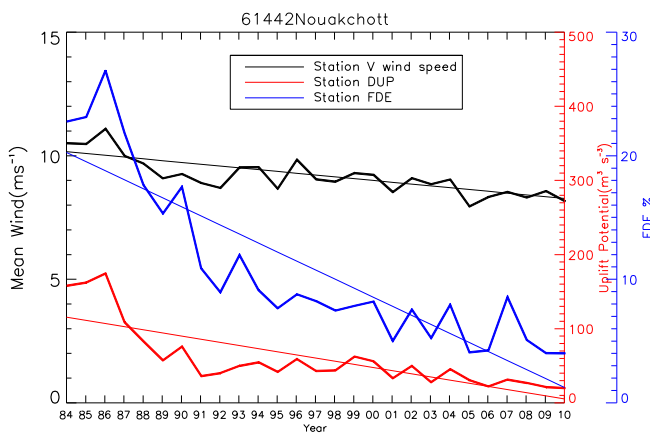

92 g)

Formatted: Font: Not Italic

93

94 **Auxiliary Figure 1:** Time series and trends separated by station. Same as Figure 2 in the  
 95 main paper, with trends in mean wind V, DUP, and FDE given in black, red, and blue but for  
 96 the individual stations of a) Agadez, b) Gouré, c) Niamey, d) Gao, e) Tombouctou, f) Nema,  
 97 and g) Nouakchott. Trend values for each station are given in Table 1.

98

Formatted: Font: Not Bold

Formatted: Centered

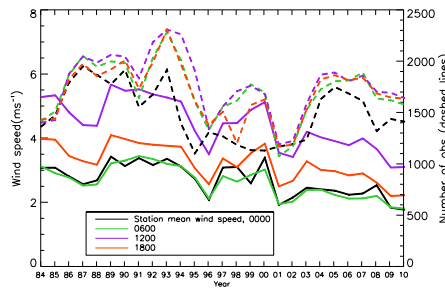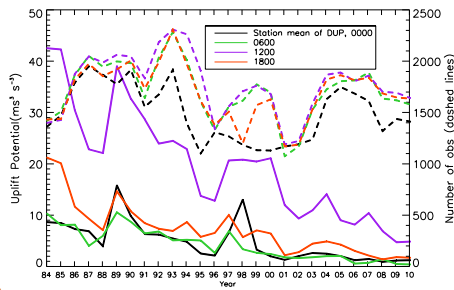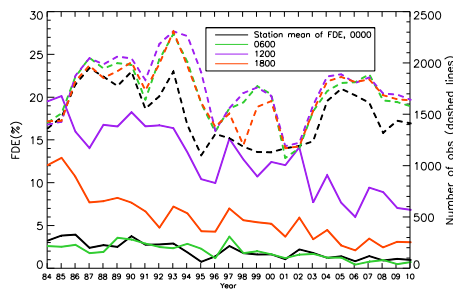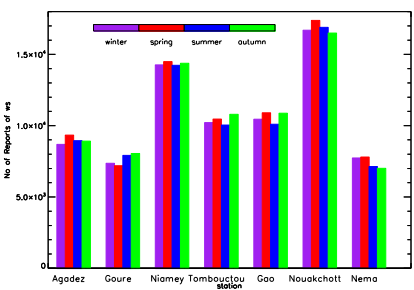

99

a

b

100

c

d

101

102

103

104

105

106

107

108

**Auxiliary Figure 2.** a) Trends in mean wind, averaged over the seven stations for the main SYNOP hours 0000 (black), 0600 (green), 1200 (purple) and 1800 UTC (orange). Number of wind speed observations are given by the same colors for the same hours with the dashed lines. b) same as a) but for DUP. c) same as a) but for FDE. d) Number of wind speed observations reported each season for each of the seven stations.



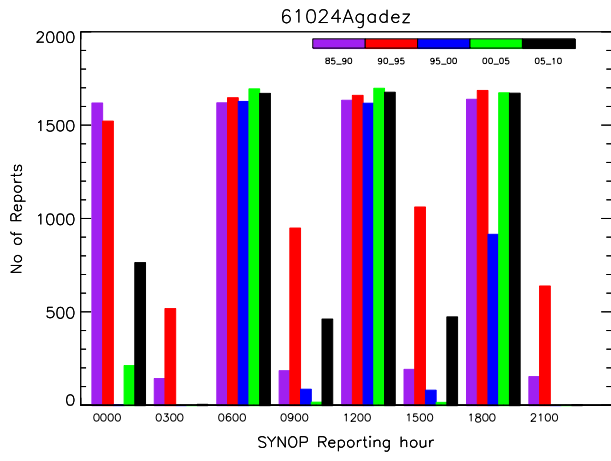

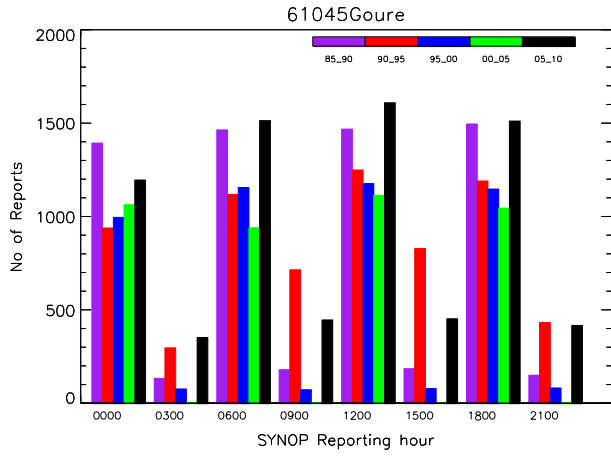

110

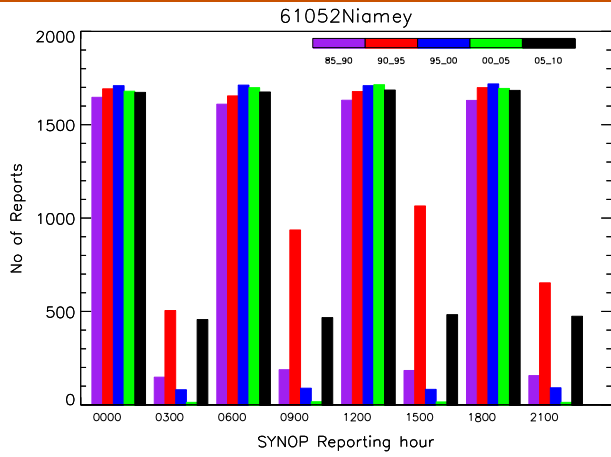

111

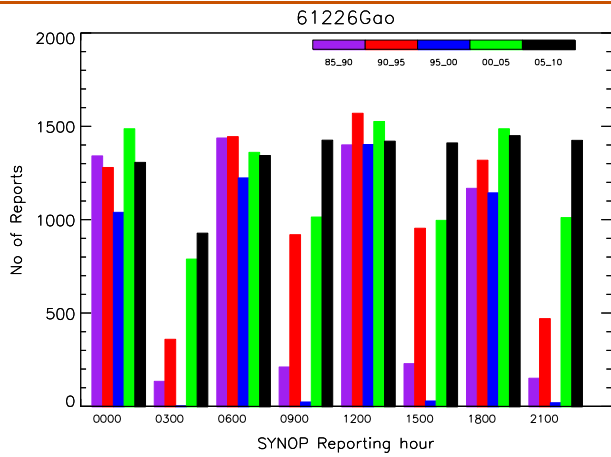

112

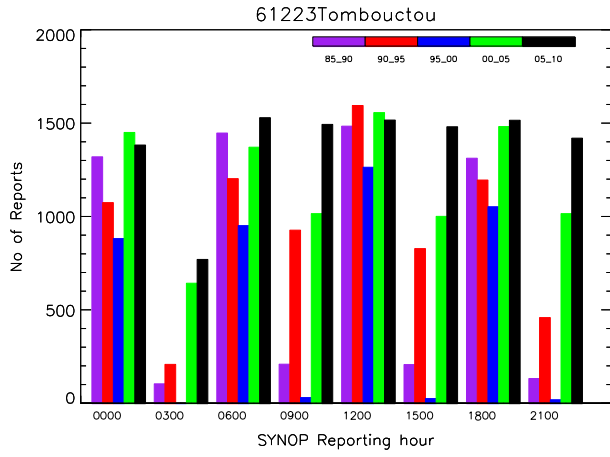

113

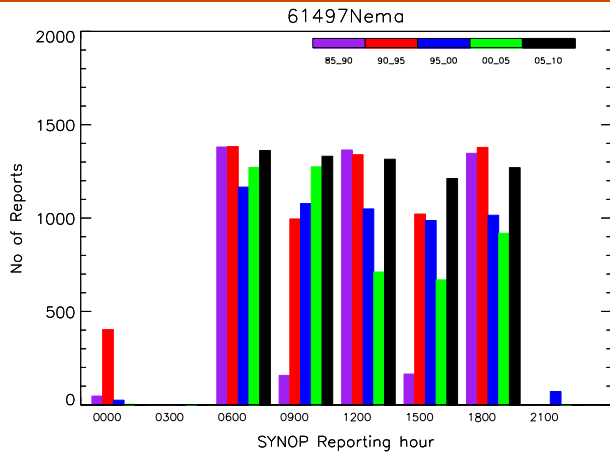

114

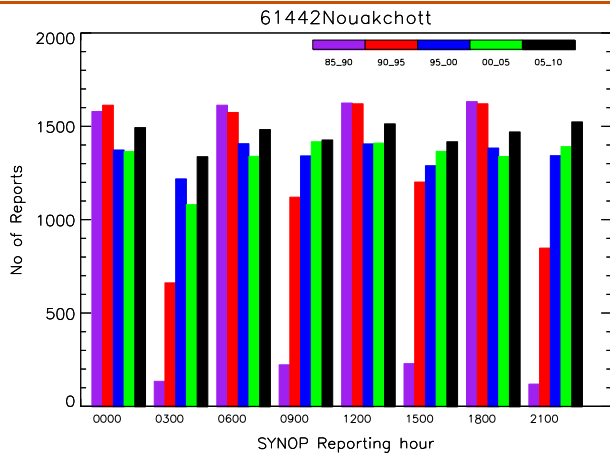

115

116 Auxiliary Figure 3: Bar plots of the number of observations at each SYNOP hour, for each  
 117 5-year period between 1985 and 2010 at: a) Agadez, b) Gouré, c) Niamey, d) Gao, e)  
 118 Tombouctou, f) Nema, and g) Nouakchott.

120 **Auxiliary Table 1: Seasonality of wind speed and dust trends.**

|   |                                      | DJF         | MAM         | JJA         | SON         | Year        |
|---|--------------------------------------|-------------|-------------|-------------|-------------|-------------|
| 1 | % change in V                        | <i>-31</i>  | <i>-23</i>  | <i>-26</i>  | <i>-30</i>  | <i>-27</i>  |
| 2 | % change in FDE                      | <i>-49</i>  | <i>-34</i>  | <i>-47</i>  | <i>-72</i>  | <i>-68</i>  |
| 3 | % change in DUP                      | <i>-84</i>  | <i>-83</i>  | <i>-90</i>  | <i>-91</i>  | <i>-86</i>  |
| 4 | % change in $V > 5 \text{ m s}^{-1}$ | <i>-16</i>  | <i>-14</i>  | <i>-21</i>  | <i>-30</i>  | <i>-20</i>  |
| 5 | % change in $V < 5 \text{ m s}^{-1}$ | <i>-4</i>   | <i>6</i>    | <i>4</i>    | <i>-2</i>   | <i>1</i>    |
| 6 | V / FDE corr                         | <i>0.74</i> | <i>0.55</i> | <i>0.41</i> | <i>0.83</i> | <i>0.92</i> |
| 7 | V / DUP corr                         | <i>0.92</i> | <i>0.93</i> | <i>0.88</i> | <i>0.76</i> | <i>0.95</i> |
| 8 | FDE / DUP corr                       | <i>0.61</i> | <i>0.53</i> | <i>0.46</i> | <i>0.72</i> | <i>0.93</i> |

121

122 **Auxiliary Table 1:** Relative changes (in %) for rows 1–5 are computed in the same way as  
 123 rows 1–3 in Table 1 in the main text. Rows 6–8 give linear correlation coefficients for seven-  
 124 station means of V, FDE, and DUP. Statistical significance of trends and correlations at the  
 125 95% and 99% levels are denoted in bold and in bold italics, respectively.

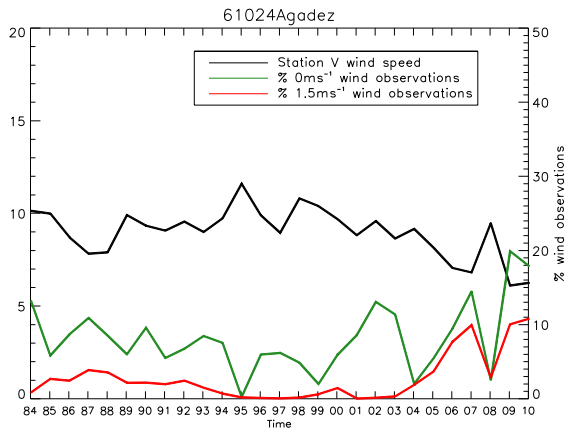

126 a)

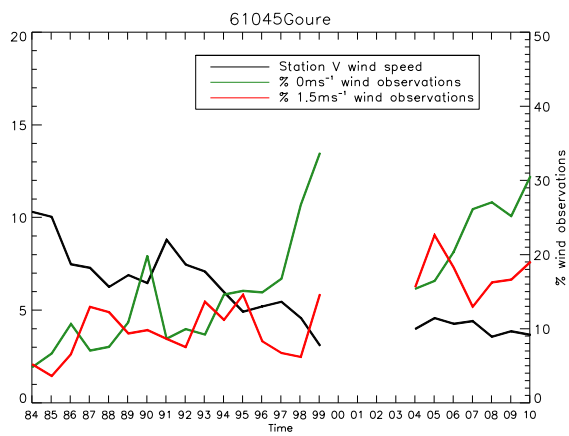

127 b)

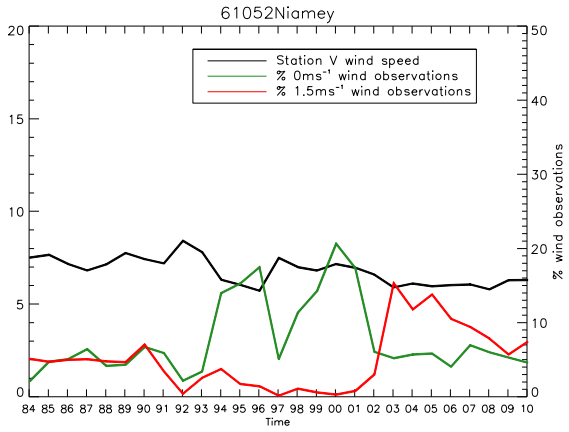

128 c)

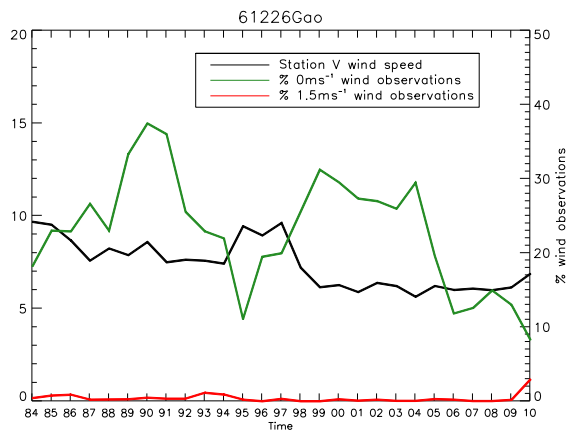

129 d)

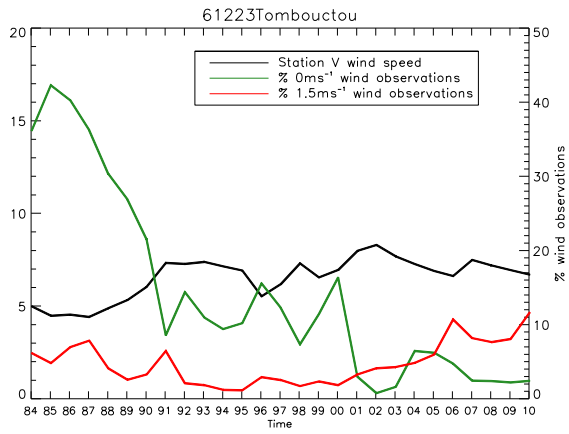

130 e)

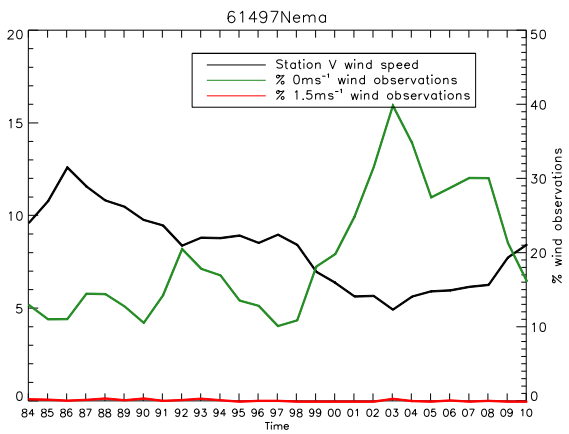

131 f)

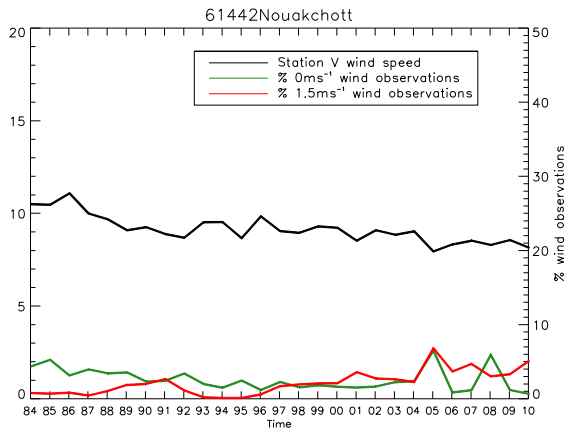

132 g)

133

134 **Auxiliary Figure 24:** Instrument degradation analysis. Time series of mean wind V (black),  
 135 % of 0 ms<sup>-1</sup> reports (green) and % of 1.5 ms<sup>-1</sup> reports (red) for the individual stations a)  
 136 Agadez, b) Gouré, c) Niamey, d) Gao, e) Tombouctou, f) Nema, and g) Nouakchott.  
 137 Percentage lines are calculated relative to all observations available for a given year. Trend  
 138 line values for the green and red lines can be found in Aux. Table 2 and for the black line in  
 139 Table 1 of the main paper.

140

141

142

143

144

145



146 **Auxiliary Table 2: Instrument degradation trends and correlations**

|   |                                                                   | Agadez              | Gouré              | Niamey             | Gao                 | Tomb.               | Nema                | Nouakchott          |
|---|-------------------------------------------------------------------|---------------------|--------------------|--------------------|---------------------|---------------------|---------------------|---------------------|
| 1 | <b>0 ms<sup>-1</sup> trend</b>                                    | <b>-52</b>          | <b><i>-186</i></b> | <b>-33</b>         | <b><i>39</i></b>    | <b><i>112</i></b>   | <b><i>-190</i></b>  | <b>49</b>           |
| 2 | <b>&lt;1.5 ms<sup>-1</sup> trend</b>                              | <b><i>-1228</i></b> | <b><i>-176</i></b> | <b><i>-220</i></b> | <b>-2</b>           | <b><i>-119</i></b>  | <b><i>99</i></b>    | <b><i>-1909</i></b> |
| 3 | <b>Correlation:<br/>&lt;1.5 ms<sup>-1</sup>/0 ms<sup>-1</sup></b> | <b><i>0.65</i></b>  | <b><i>0.52</i></b> | <b><i>-0.4</i></b> | <b><i>-0.29</i></b> | <b><i>-0.07</i></b> | <b><i>-0.16</i></b> | <b><i>-0.02</i></b> |

147

148 **Auxiliary Table 2.** Rows 1 and 2 contain the 0 ms<sup>-1</sup> trend (green lines) and <1.5 ms<sup>-1</sup> trend  
 149 (red lines) values as plotted in Aux. Figure 3. Row 3 gives the corresponding linear  
 150 correlation. Statistical significance of trends and correlations at the 95% and 99% levels are  
 151 denoted in bold and in bold italics, respectively.

152

153

154

155

156

157

Sahel Observation stations, DJF Vectors

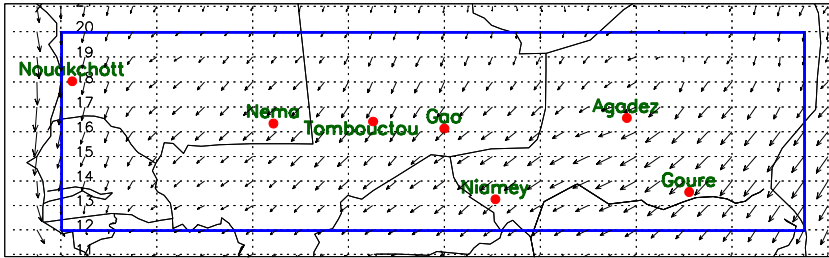

158 a)

Sahel Observation stations, MAM Vectors

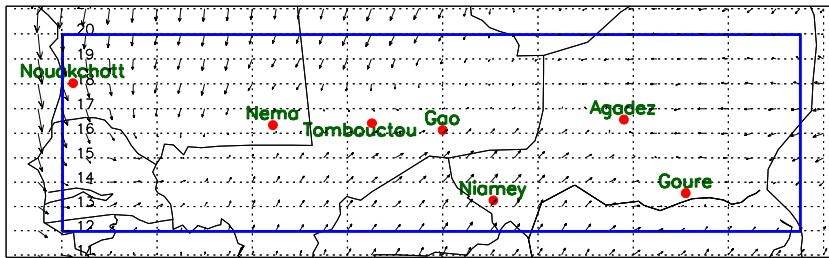

159 b)

Sahel Observation stations, JJA Vectors

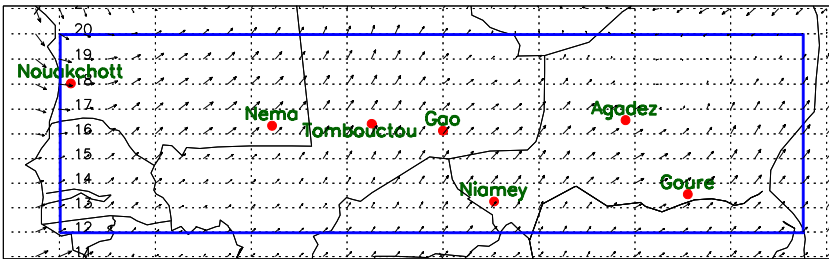

160 c)

Sahel Observation stations, SON Vectors

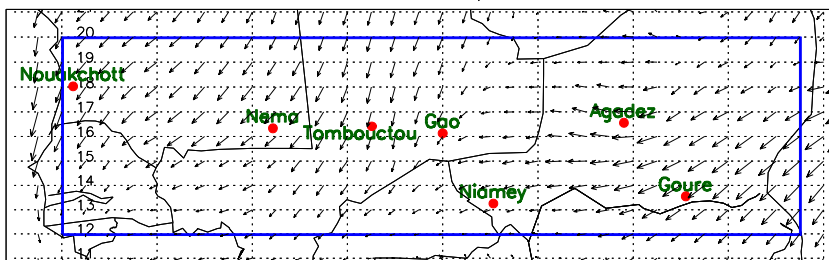

161 d)

162

163 | **Auxiliary Figure 35:** Seasonality of ERA mean wind vectors. Map of the Sahel with station  
 164 | locations and the ERA-Interim 10 m mean wind vectors for a) DJF, b) MAM, c) JJA, and d)  
 165 | SON similar to Fig. 1 of the main paper. The blue box is the area domain used for averaging  
 166 | ERA 10-m winds in the trend and correlation analysis.

167

168

169 **Auxiliary Table 3: Seasonality of ERA mean wind and DUP**

|          |                                    | <b>DJF</b>         | <b>MAM</b>         | <b>JJA</b>          | <b>SON</b>         | <b>Year</b>        |
|----------|------------------------------------|--------------------|--------------------|---------------------|--------------------|--------------------|
| <b>1</b> | <b>% change in ERA V</b>           | <b>-7</b>          | <b>-4</b>          | <b>2</b>            | <b>-5</b>          | <b>-3</b>          |
| <b>2</b> | <b>% change in ERA DUP</b>         | <b>-31</b>         | <b>-5</b>          | <b>2</b>            | <b>-27</b>         | <b>14</b>          |
| <b>3</b> | <b>ERA V / ERA DUP correlation</b> | <i><b>0.85</b></i> | <i><b>0.83</b></i> | <i><b>0.50</b></i>  | <i><b>0.80</b></i> | <i><b>0.60</b></i> |
| <b>4</b> | <b>ERA V / Obs V correlations</b>  | <i><b>0.71</b></i> | <i><b>0.56</b></i> | <i><b>-0.07</b></i> | <i><b>0.53</b></i> | <i><b>0.56</b></i> |

170

171 **Auxiliary Table 3:** Seasonality of ERA mean wind and DUP. Relative changes (in %) of  
 172 ERA-Interim mean wind V and DUP. Rows 1 and 2 are computed in the same way as rows  
 173 1–3 in Table 1 in the main text. Statistical significance of trends and correlations at the 95%  
 174 and 99% levels are denoted in bold and in bold italics, respectively.

175

176

177

178

179

180 **Auxiliary Table 4: Correlations of mean wind and observed dust with the NAO index.**

|          |              | <b>DJF</b>  | <b>MAM</b>  | <b>JJA</b>   | <b>SON</b>  | <b>Year</b> |
|----------|--------------|-------------|-------------|--------------|-------------|-------------|
| <b>1</b> | <b>V ERA</b> | <i>0.77</i> | <b>0.31</b> | <b>-0.21</b> | <b>0.43</b> | <b>0.58</b> |
| <b>2</b> | <b>V OBS</b> | <b>0.5</b>  | <b>0.14</b> | <b>0.43</b>  | <b>0.28</b> | <b>0.46</b> |
| <b>3</b> | <b>FDE</b>   | <b>0.58</b> | <b>0.36</b> | <b>0.26</b>  | <b>0.3</b>  | <b>0.52</b> |

181

182 **Auxiliary Table 4:** Correlations of mean wind and observed dust with the NAO index.

183 Seasonal correlations of ERA-Interim mean wind V (row 1), observation mean wind V (row

184 2), and observed FDE (row 3) with the seasonal Jones NAO Index (as described in Section

185 2). Significance of trends and correlations at the 95% and 99% levels are denoted in bold and

186 in bold italics, respectively.

187

188

189

190

191

192

193

194 **Auxiliary Table 5: Day/night station trends comparison**

|                                                               |          |                  | DJF          | MAM          | JJA          | SON          | Year         |
|---------------------------------------------------------------|----------|------------------|--------------|--------------|--------------|--------------|--------------|
| <b>Absolute trends</b><br>(ms <sup>-1</sup> a <sup>-1</sup> ) | <b>1</b> | <b>Day V</b>     | <i>-0.07</i> | <i>-0.05</i> | <i>-0.05</i> | <i>-0.06</i> | <i>-0.06</i> |
|                                                               | <b>2</b> | <b>Night V</b>   | <i>-0.09</i> | <i>-0.05</i> | <i>-0.05</i> | <i>-0.04</i> | <i>-0.04</i> |
|                                                               | <b>3</b> | <b>Day DUP</b>   | <i>-9.5</i>  | <i>-8.1</i>  | <i>-5.5</i>  | <i>-4.9</i>  | <i>-7</i>    |
|                                                               | <b>4</b> | <b>Night DUP</b> | <i>-3.8</i>  | <i>-2.6</i>  | <i>-3.8</i>  | <i>-1.7</i>  | <i>-3</i>    |
| <b>relative change</b><br>(%)                                 | <b>5</b> | <b>Day V</b>     | <i>-30</i>   | <i>-25</i>   | <i>-27</i>   | <i>-36</i>   | <i>-28</i>   |
|                                                               | <b>6</b> | <b>Night V</b>   | <i>-59</i>   | <i>-35</i>   | <i>-39</i>   | <i>-53</i>   | <i>-31</i>   |
|                                                               | <b>7</b> | <b>Day DUP</b>   | <i>-83</i>   | <i>-86</i>   | <i>-87</i>   | <i>-92</i>   | <i>-86</i>   |
|                                                               | <b>8</b> | <b>Night DUP</b> | <i>-105</i>  | <i>-91</i>   | <i>-98</i>   | <i>-79</i>   | <i>-97</i>   |

195

196 **Auxiliary Table 5:** Day/night station trends comparison. Seasonal absolute and relative  
 197 trends of day and night data from station averaged observations. Absolute trends in rows 1–4  
 198 are calculated as the average change in wind speed per year, while rows 5–8 represent the  
 199 total change in wind speed during the study period 1984–2010 as a % of the initial value.  
 200 Significance of trends at the 95% and 99% levels are denoted in bold and in bold italics,  
 201 respectively.

202
